# Supplementary material
Source: PubMed Central journal article supplement (PMC5665445)
Supplement: joces-130-203216-s1.pdf [file joces-130-203216-s1.pdf]

**SUPPLEMENTAL FIGURES**

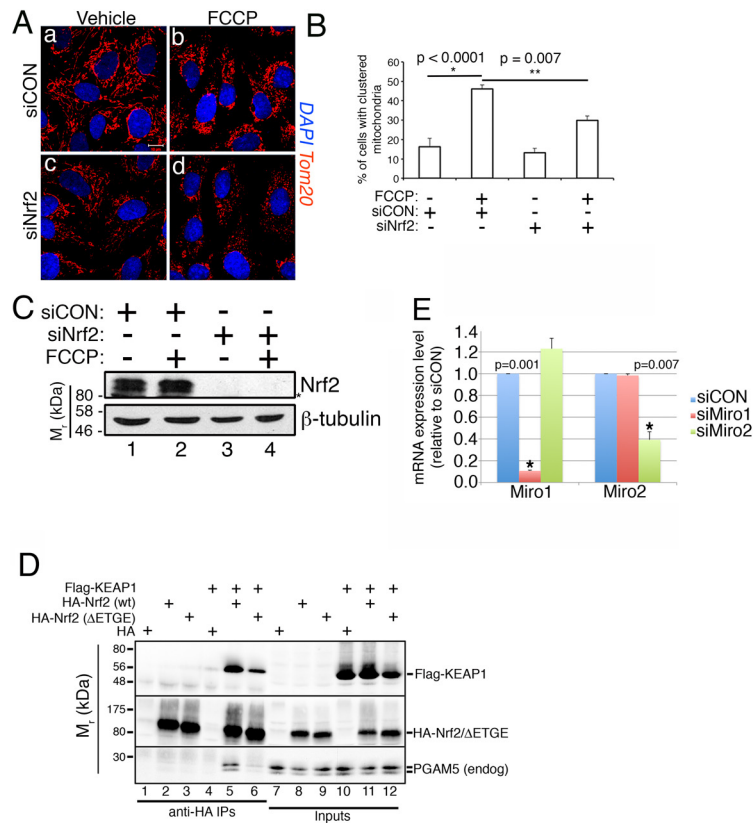

Supplemental Figure 1

**Supplemental Figure 1.** (A) RPE-1 cells transfected with siCON or siNrf2 and treated with 5 mM FCCP for 4 hrs. Mitochondria labeled with  $\alpha$ -Tom20 (red) and nuclei with DAPI (blue). Size bar is 10  $\mu$ m. (B) Graph of mitochondrial clustering frequency from (A). Data compiled from 3 independent experiments. Error bars reflect +/- S.D. (C) Representative western blot demonstrating Nrf2 knockdown efficiency. Asterisk denotes non-specific band recognized by  $\alpha$ -Nrf2 antibody. The migration of molecular weight markers is indicated on the left. (D) HEK293T cells were transfected with the indicated plasmids and 2 days later lysed for anti-HA immunoprecipitations. HA-tagged Nrf2 co-precipitated Flag-KEAP1 and endogenous PGAM5 (lane 5). ETGE is a 4-residue motif within the Neh2 domain of Nrf2 that mediates binding to KEAP1. The DETGE Nrf2 mutant is deficient in KEAP1 binding and fails to co-precipitate endogenous PGAM5 (lane 6). The migration of molecular weight markers is indicated to the left of each blot. (E) Graph of qPCR data demonstrating that siRNAs targeting Miro1 and Miro2 selectively reduce mRNA levels of each intended target. mRNA expression levels for each sample are compared to siCON. Statistical significance in (B) was determined by two-way ANOVA with Tukey's post-hoc correction and in (E) by one-way ANOVA.

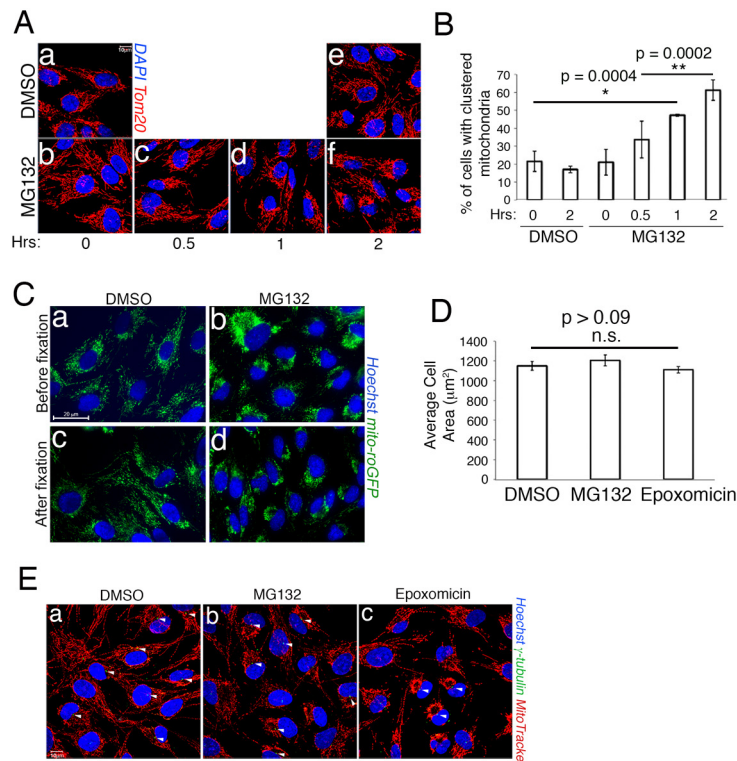

Supplemental Figure 2

**Supplemental Figure 2.** (A) RPE-1 cells were treated with DMSO or 10 mM MG132 for the indicated times. Mitochondria labeled with  $\alpha$ -Tom20 (red) and nuclei with DAPI (blue). (B) Graph of mitochondrial clustering frequency from (A). Data compiled from 3 independent experiments. Error bars reflect  $\pm$  S.D. (C) mitroGFP-expressing RPE-1 cells were treated with DMSO or 10 mM MG132 for 2 hrs. Epifluorescent microscopy was performed before (panels a and b) and after (panels c and d) fixation in 3.7% formaldehyde. (D) Graph of cell area in RPE-1 cells treated with DMSO, 10 mM MG132, or 1 mM epoxomicin for 2 hrs. 20X phase images were captured and free-form ROIs were drawn around cell borders. Cell area was measured using OpenLab™ software. Graph depicts data compiled from 3 independent experiments. Error bars reflect  $\pm$  S.E.M. (E) RPE-1 cells were treated with DMSO, 10 mM MG132, or 1 mM epoxomicin for 2 hrs and then fixed with ice-cold methanol and permeabilized with 0.02% Triton X-100. Centrosomes were visualized with anti-g-tubulin (green, examples marked with white arrowheads), mitochondria with MitoTracker (red), and nuclei with Hoechst 33342 (blue). Size bars in (A), (C) and (E) are 10  $\mu$ m. Statistical significance in (B) and (D) was determined by two-way and one-way ANOVA, respectively, with Tukey's post-hoc corrections.

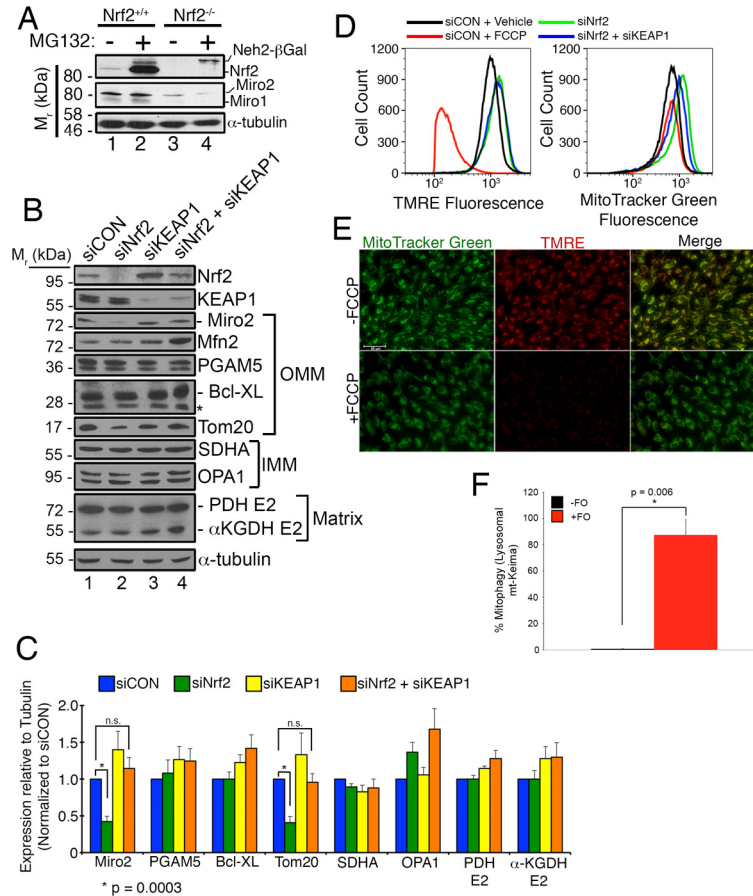

Supplementary Figure 3

**Supplemental Figure 3** (A) Western blots showing that Nrf2 knockout (Nrf2<sup>-/-</sup>) MEFs have reduced Miro proteins and MG132 treatment stabilizes residual Neh2-bGal. The migration of molecular weight markers is indicated to the left of each blot. Strain-matched wild type control MEFs (Nrf2<sup>+/+</sup>) shown for comparison. (B) Representative western blots showing levels of mitochondrial proteins (OMM – outer mitochondrial membrane; IMM – inner mitochondrial membrane) in cells transfected with the indicated siRNAs. PDH E2 and  $\alpha$ -KGDH E2 were both detected with an antibody against lipoic acid. (C) Graph showing densitometric quantification of each mitochondrial protein in (B) relative to tubulin loading control. All data are normalized to siCON, which was set at a value of 1. Graph represents data compiled from 6 independent experiments. (D) Representative FACS traces for measuring TMRE and MTG uptake in cells treated with the indicated siRNAs or with FCCP as in Figs 8F-8G. (E) Photomicrographs of control and depolarized mitochondria. TMRE uptake by mitochondria does not occur in cells treated with 5 mM FCCP. Scale bar is 65  $\mu$ m. (F) Mitophagic flux in RPE-1 cells expressing mt-mKeima and YFP-parkin. Cells were treated with vehicle (-FO, black bar) or a combination of 5 mM FCCP and 5 mM Oligomycin A (+FO, red bar) for 4 hrs prior to being harvested for FACS. Graph represents % of cells containing lysosomal mt-mKeima and was compiled from 3 independent experiments. Statistical significance in (C) and (F) were determined by one-way ANOVA and paired, two-tailed t-test, respectively. Error bars represent +/- S.E.M.

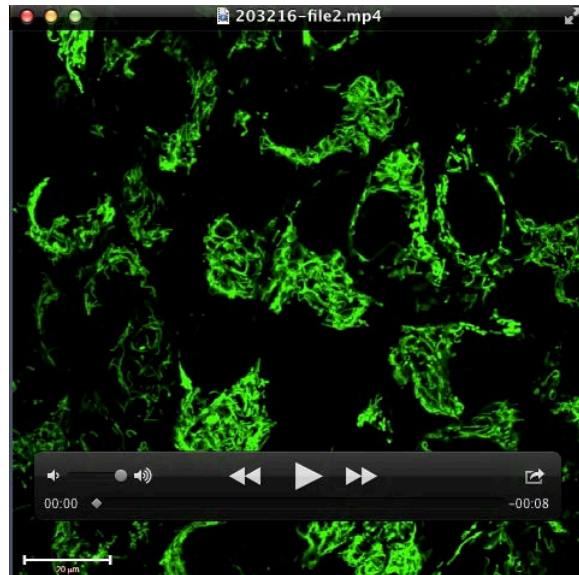

**Supplemental Movie 1** – Mito-roGFP cells treated with 4 mg/mL nocodazole for 2 hrs prior to the start of filming show a near complete loss of mitochondrial motility due to depolymerization of microtubules.

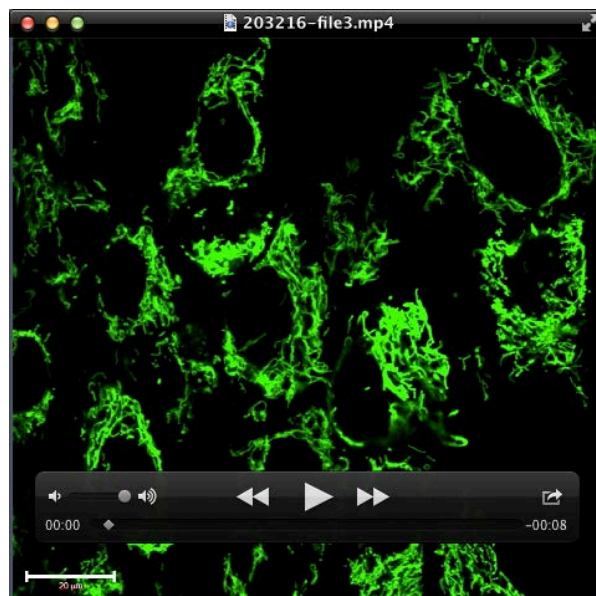

**Supplemental Movie 2** – Mito-roGFP cells matched to those in Supplemental Movie 1 were pre-treated with nocodazole for 2 hrs prior to the addition of 10 mM MG132 and show no discernible retrograde trafficking and perinuclear accumulation of mitochondria due to depolymerization of microtubules.

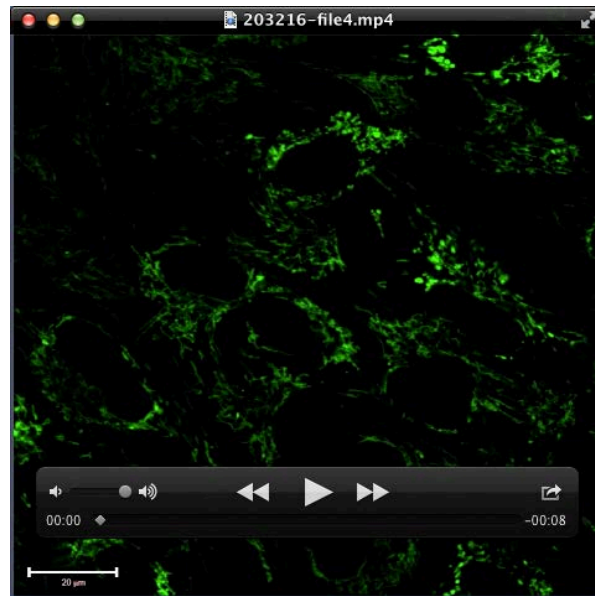

**Supplemental Movie 3** – Vehicle (DMSO)-treated mito-roGFP cells show rapid mitochondrial trafficking, as well as fission and fusion activity.

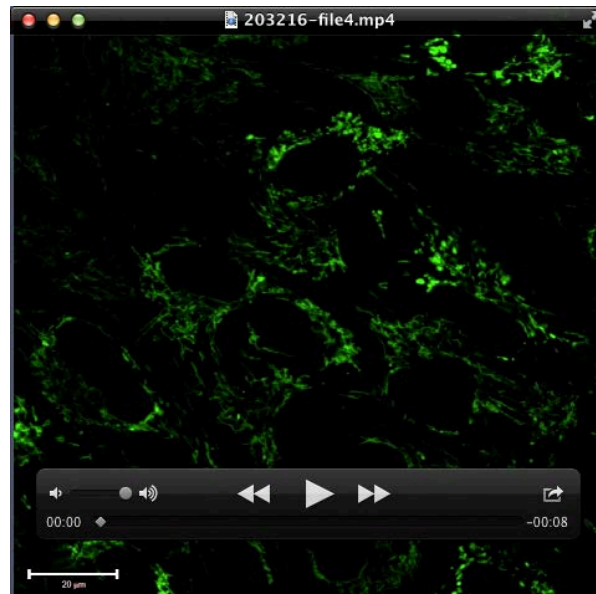

**Supplemental Movie 4** – 10 mM MG132-treated mito-roGFP cells matched to vehicle-treated cells in Supplemental Movie 3 show rapid fission and fusion, with a net retrograde mitochondrial trafficking leading to perinuclear clustering of the mitochondria. Arrows denote cells displaying juxtannuclear mitochondrial rings induced by proteasome inhibition.

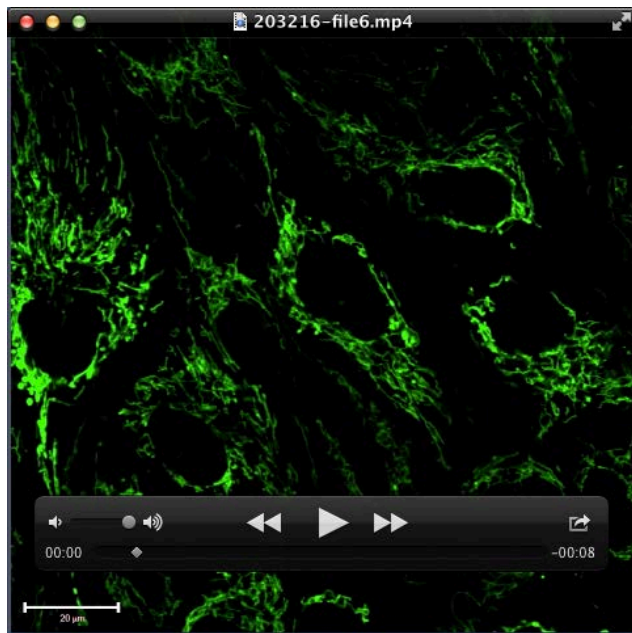

**Supplemental Movie 5** – Mito-roGFP cells transfected with siNrf2 and then treated with DMSO show no discernable defects in mitochondrial fission, fusion, or trafficking.

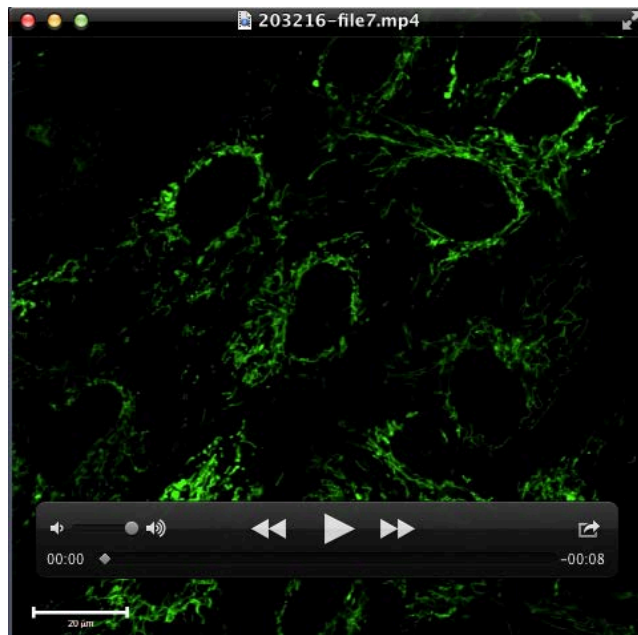

**Supplemental Movie 6** – Mito-roGFP cells transfected with Nrf2 siRNA and then treated with 10 mM MG132 show rapid fission and fusion, but attenuated mitochondrial retrograde trafficking and perinuclear clustering.

**Supplemental Table: Antibodies and Chemicals**

| Protein      | Species | Company          | Catalog #          | Immunofluorescence/Western Dilutions |
|--------------|---------|------------------|--------------------|--------------------------------------|
| Tom20        | Mouse   | BD Bioscience    | 612278             | 1:1000/NA                            |
| β-tubulin    | Mouse   | Sigma-Aldrich    | T4026              | 1:2500/1:1000                        |
| PGAM5        | Rabbit  | Novus            | NBP1-92257         | 1:1000/1:500                         |
| HA (12CA5)   | Mouse   | Univ of Virginia | Hybridoma Facility | NA/1:1000                            |
| γ-tubulin    | Rabbit  | Sigma-Aldrich    | T5192              | 1:1000/NA                            |
| Drp1         | Mouse   | BD Transduction  | 611113             | NA/1:1000                            |
| Bcl-XL       | Rabbit  | Cell Signaling   | 2762               | NA/1:1000                            |
| SDHA         | Mouse   | Santa Cruz       | sc-377302          | NA/1:500                             |
| OPA1         | Mouse   | BD Transduction  | 612606             | NA/1:500                             |
| Hsp60        | Goat    | Santa Cruz       | sc-1052            | 1:1000/1:1000                        |
| GFP          | Mouse   | Rockland         | 600-301-215        | NA/1:500                             |
| Hsp70        | Mouse   | Enzo             | ADI-SPA-810        | NA/1:1000                            |
| α-tubulin    | Mouse   | Sigma-Aldrich    | T9026              | NA/1:1000                            |
| Nrf2         | Rabbit  | Plafker lab      | In-house antibody  | 1:300/1:2000                         |
| p62/SQSTM1   | Mouse   | Abcam            | Ab56416            | NA/1:1000                            |
| KEAP1        | Rabbit  | Proteintech      | 10503-2-AP         | NA/1:1000                            |
| Mfn2         | Rabbit  | Weissman lab     | In-house antibody  | NA/1:1000                            |
| Miro1*       | Mouse   | Abcam            | Ab55035            | NA/1:500                             |
| KGDH and PDH | Rabbit  | Szweda Lab       | In-house antibody  | NA/1:1000                            |

\*Detects Miro1 and Miro2

| Chemical                      | Company          | Concentration |
|-------------------------------|------------------|---------------|
| MG132                         | Boston Biochem   | 10 μM         |
| Epoxomicin                    | Cayman Chemicals | 1 μM          |
| Nocodazole                    | Sigma-Aldrich    | 4 μg/ml       |
| Actinomycin D                 | Gibco            | 1 mM          |
| Cycloheximide                 | Sigma-Aldrich    | 50 mM         |
| FCCP                          | Cayman Chemical  | 5 mM          |
| H <sub>2</sub> O <sub>2</sub> | Sigma-Aldrich    | 1 mM          |
| DTT                           | Sigma-Aldrich    | 1 mM          |
| Oligomycin A                  | Sigma-Aldrich    | 5 μM          |

siRNA oligomers

| <b>Gene</b>       | <b>Company</b> | <b>Catalog #</b> |
|-------------------|----------------|------------------|
| Control (siCON)   | Dharmacon      | D-001220-01      |
| <i>Nrf2</i>       | Dharmacon      | L-003755-00-0005 |
| <i>PGAM5</i>      | Ambion         | 4392420          |
| <i>KEAP1</i>      | Cell Signaling | 5289             |
| <i>p62/SQSTM1</i> | Cell Signaling | 6399             |
| <i>Miro1</i>      | Dharmacon      | L-010365-01-0005 |
| <i>Miro2</i>      | Dharmacon      | L-008340-01-0005 |
| <i>Drp1</i>       | Dharmacon      | L-012092-00-0005 |
| <i>Mfn2</i>       | Dharmacon      | L-012961-00-0005 |
| <i>Cul3</i>       | Qiagen         | SI02225685       |
